# Supplementary material for: Effect of sleep quality on vision-related quality of life in a sample of Qassim University students: an ocular surface health approach
Source: PeerJ. 2025 Aug 4;13:e19801. doi: 10.7717/peerj.19801 (PMC12330819; doi:10.7717/peerj.19801)
Supplement: Supplemental Information 1 — All the measurements and marks graded for the questionnaires per each validated questionnaire’s instruction. The objective measurements for ocular surface is provided. [file peerj-13-19801-s001.xlsx]

## Sheet: Sheet1
Personal Data				Schrimer test			KERATOGRAPHY												VFQ25													OSDI					Pittsburgh Sleep Quality Index
Serial number	Age	Gender	Time at test	OD Schrimer test	OS Schrimer test	OD TMH	OS TMH	OD NITBUT	OS NITBUT	OD interferometry	OS interferometry	OD meibography	OS meibography	OD conj redness	OS conj redness	General med history	Sleep aids	Quality of life	General health	General vision	Ocular pain	Near activities	Distance activities	Social functioning	Mental health	Role difficulties	Dependancy	Driving	Color vision	Peripheral vision	OSDI	Q1-5	Q6-9	Q10-12	Total	Pittsburgh	Component 1	Component 2	Component 3	Component 4	Component 5	Component 6	Component 7	Total
1	23	M	12:50:00	4	26	0.26mm	0.26mm	2	2	1	1	1	1	1	2	no	no	35.25	100	100	50	75	91.66	100	75	50	100	75	100	100		3	7	3	13		0	3	1	0	1	0	2	7
2	24	M	12:30:00	25	26	0.24mm	0.24mm	4.33	2	1	1	0	1	2	1	no	no	39.5	75	100	75	100	91.66	100	93.75	100	100	91.66	100	75		5	1	4	10		1	2	0	0	1	0	1	5
3	24	M	13:06:00	13	23	0.27mm	0.28mm	4.66	5	1	1	1	2	1	1	no	no	40.01	75	80	75	100	100	100	93.75	100	100	91.66	100	100		5	7	5	17		1	2	0	0	2	0	2	7
4	24	M	13:15:00	3	4	0.28mm	0.33mm	2.66	2.66	1	1	2	2	1	2	no	no	32.29	100	100	50	83.33	41.66	62.5	93.75	100	100	58.33	100	50		12	10	7	29		0	1	0	1	1	0	0	3
5	23	M	13:27:00	20	15	0.32mm	0.35mm	6	5.66	1	1	2	2	2	2	no	no	39.93	50	80	75	83.33	100	100	100	100	100	100	100	100		7	8	8	23		1	2	0	0	2	0	1	6
6	23	M	1:37PM	10	10	0.28mm	0.27mm	5	5.66	2	2	1	2	1	1	no	no	41.74	100	100	100	100	100	100	93.75	100	100	91.66	100	100		0	0	1	1		1	1	0	1	1	0	1	5
7	24	M	13:43:00	17	25	0.27mm	0.29mm	4.33	3.66	1	1	1	1	1	1	no	no	40.94	75	100	87.5	91.66	100	100	93.75	100	100	91.66	100	100		2	3	8	13		0	2	0	0	1	0	1	4
8	23	M	1:58PM	32	7	0.25mm	0.24mm	3	3.66	1	1	2	2	2	1	no	no	38.86	50	100	62.5	91.66	100	100	93.75	87.5	100	100	100	75		3	1	2	6		1	1	2	2	1	0	1	8
9	24	M	14:05:00	33	21	0.28mm	0.28mm	7.33	5.66	2	1	1	1	2	1	no	no	39.74	75	100	50	91.66	91.66	100	100	100	100	100	100	100		6	5	6	17		1	2	0	1	1	0	1	6
10	23	M	12:05PM	10	35	0.37mm	0.41mm	3	4	1	1	1	1	2	1	Asthma	no	39.11	0	80	75	87.5	91.66	87.5	93.75	62.5	100	100	100	100		4	1	1	6		1	2	0	1	1	0	2	7
11	24	M	12:11:00	24	17	0.28MM	0.26MM	4.66	6	1	1	1	1	1	1	no	no	39.13	50	80	87.5	91.66	91.66	100	75	100	100	91.66	100	100		5	0	6	11		2	3	2	0	1	0	2	10
13	24	M	12:17PM	30	25	0.21MM	0.25MM	17.27	22.08	2	1	2	1	1	1	no	no
14	23	M	12:13PM	30	21	0.32mm	0.31mm	5.33	5.66	1	1	1	2	1	1	no	no	41.5	100	100	100	100	91.66	100	87.5	100	100	100	100	100		3	3	0	6			3	1	1	1	0	0	7
15	24	M	12:08PM	35	35	0.38mm	0.35mm	10.66	9	1	1	1	1	1	1	no	no	42.3	75	100	100	100	100	100	100	100	100	100	100	100		0	0	0	0		1	2	1	0	1	0	1	6
16	23	M	12:43PM	35	25	0.34mm	0.34mm	22.56	19.43	1	1	1	0	1	1	no	no	41.82	75	100	87.5	100	100	100	100	100	100	100	100	100		3	0	8	11		1	3	0	0	1	0	1	6
17	21	M	12:58PM	30	30	0.41mm	0.25mm	18.08	22.75	1	1	2	2	2	2	no	no	35.35	75	100	75	91.66	100	75	87.5	100	100	75	100	75		1	5	1	7		1	1	2	1	2	0	2	9
18	22	M	01:20PM	35	32	0.21mm	0.30mm	10.52	6.75	1	1	1	2	3	3	no	no	38.94	25	80	50	91.66	87.5	100	81.25	100	91.66	91.66	100	100		5	0	5	10		3	1	3	1	1	0	3	12
19	23	M	11:37AM	29	22	0.28mm	0.24mm	7	7.29	1	1	2	2	2	2	no	no	35.68	75	80	87.5	83.33	91.66	75	93.75	100	100	91.66	75	50		6	4	4	14		3	2	1	0	1	3	3	13
20	25	M	1:09PM	3	1	0.22mm	0.22mm	16.95	12.04	1	2	1	1	1	2	no	no	30.99	50	60	87.5	66.66	66.66	100	87.5	87.5	75	75	75	25		2	6	3	11		1	3	0	0	1	0	1	6
21	24	M	1:18PM	21	35	0.40mm	0.44mm	REPEAT	REPEAT	1	1	1	2	1	1	no	no	40.89	0	80	100	100	100	100	100	100	83.33	100	100	100		1	8	0	9		1	1	3	0	1	0	1	7
22	23	M	12:08PM	27	12	0.35mm	0.29mm	10.29	14.72	1	2	1	1	1	1	no	no	41.82	100	100	87.5	100	100	100	100	100	100	100	100	100		2	0	3	5		1	1	0	0	1	0	1	4
23	23	M	12:56:00	35	35	0.33mm	0.31mm	4.33	4	1	1	2	1	2	2	no	no	38.22	50	100	75	83.33	75	100	93.75	100	100	91.66	100	75		8	2	8	18		0	3	0	1	1	1	2	8
24	24	M	12:21PM	35	35	0.24mm	0.24mm	6.66	5	1	1	1	1	1	1	no	no	39.16	75	80	75	100	91.66	100	100	100	100	83.33	100	100		1	2	2	5		1	3	0	0	1	0	0	5
25	23	M	1:11PM	32	7	0.31mm	0.33mm	3.33	4	1	1	1	1	1	2	Sinusitis	no	41.82	75	100	87.5	100	100	100	100	100	100	100	100	100		5	0	4	9		0	1	0	1	2	0	1	5
26	24	M	1:37PM	33	20	0.25mm	0.31mm			1	1	1	1	1	2	no	no	42.3	100	100	100	100	100	100	100	100	100	100	100	100		6	5	4	15		0	0	3	3	1	0	1	8
27	23	M	10:50AM	35	32	0.40mm	0.38mm	5.33	5.66	1	1	2	3	2	1	no	no	42.3	100	100	100	100	100	100	100	100	100	100	100	100		0	0	1	1		1	0	1	0	1	0	1	4
28	19	M	10:37PM	35	35	0.22mm	0.17mm	2	2.66	1	1	1	1	1	1	no	no	35.09	100	100	75	83.33	58.33	62.5	87.5	62.5	100	83.33	100	100		4	0	0	4		1	0	2	0	1	0	3	7
29	25	M	11:16AM	10	11	0.32mm	0.29mm	3	4	1	1	2	2	1	1	no	no	41.58	50	100	87.5	100	100	100	93.75	100	100	100	100	100		1	1	0	2		1	3	0	0	1	0	1	6
30	23	M	1:02PM	28	8	0.24mm	0.27mm			1	1	2	2	1	1	no	no	34.4	75	80	62.5	100	75	75	93.75	100	100	83.33	100	25		4	3	5	12		2	2	2	0	2	0	2	10
31	23	M	1:18PM	3	3	0.28mm	0.30mm			1	2	1	2	1	1	no	no	41.75	75	100	100	100	100	100	93.75	50	100	100	100	100		8	13	0	21		1	2	1	0	2	0	0	6
32	21	F	10:45:00	5	5	0.31mm	0.23mm	5	7	1	1	1	2	1	1	no	no	29.8	75	80	50	66.66	66.66	50	56.25	62.5	83.33	*	100	100		14	10	6	30		3	1	2	0	1	0	1	8
33	21	F	11:00AM	23	8	0.27mm	0.22mm	9	11	2	2	0	0	1	1	no	no	40.94	75	100	100	91.66	91.66	87.5	93.75	100	100	100	100	100		1	1	4	6		0	1	0	0	0	0	1	2
34	21	F	1:54PM	4	26	0.20mm	0.21mm	2.66	3.66	1	1	2	2	1	1	no	no	40.78	50	100	75	100	91.66	100	93.75	100	100	100	100	100		12	1	2	15		1	2	1	0	1	0	1	6
35	21	F	11:10AM	25	27	0.24mm	0.41mm	3	5	1	1	0	0	1	1	no	no	41.5	100	100	87.5	100	100	100	100	100	100	91.66	100	100		9	9	11	29		1	1	0	0	1	0	1	4
36	22	F	11:23AM	11	35	0.27mm	0.25mm	11	9	1	1	0	0	1	1	no	no	36.61	100	80	75	100	75	100	68.75	100	83.33	58.33	100	75		10	4	9	23		1	1	2	0	1	0	2	7
37	24	M	12:22PM	28	27	0.31mm	0.29mm	6.33	6	1	1	1	1	2	2	no	no	41.34	75	100	75	100	100	100	100	100	100	100	100	100		6	0	5	11		1	3	1	0	1	2	1	9
38	22	F	1:30PM	35	30	0.26mm	0.35mm	3.66	4	1	1	2	1	1	1	no	no	43.16	75	100	87.5	100	100	100	100	100	100	91.66	100	100		9	3	4	16		0	0	0	0	1	0	1	2
39	22	F	1:34PM	32	35	0.26mm	0.24mm	4	4	1	1	1	1	1	1	no	no	43.47	100	100	100	100	100	100	100	100	100	*	100	100		1	0	1	2		1	1	1	0	1	0	2	6
40	23	F	1:42PM	12	12	0.35mm	0.30mm	3.33	6.33	1	1	1	1	1	1	no	no	42.41	100	100	100	100	83.33	100	93.75	100	100	83.33	100	100		1	1	1	3		0	1	0	0	1	3	0	5
41	22	F	1:51PM	26	32	0.35mm	0.26mm	4	3.33	1	1	2	2	1	1	no	no	38.8	75	80	87.5	91.66	91.66	100	75	100	91.66	*	100	75		0	0	7	7		1	1	1	0	1	0	1	5
42	22	F	1:57PM	27	35	0.32mm	0.28mm	2.66	2.33	1	1	1	1	1	1	no	ni	26.77	25	40	62.5	75	50	87.5	56.25	75	50	50	100	50		15	11	8	34		3	2	2	3	2	0	1	13
43	22	F	2:02PM	27	6	0.27mm	0.29mm	6.66	6.33	1	1	2	2	1	1	no	panadol night occasionally	38.86	75	100	75	58.33	83.33	100	93.75	100	100	100	100	100		4	7	5	16		1	3	1	0	2	2	0	9
44	22	F	2:08PM	34	35	0.33mm	0.34mm	5	2.33	2	2	1	1	1	1	no	no	41.82	50	100	87.5	100	100	100	100	100	100	100	100	100		3	2	2	7		1	1	1	2	1	0	2	8
45	23	F	2:16PM	27	10	0.29mm	0.27mm	3.66	6.33	1	1	2	2	1	1	no	no	41.26	75	100	87.5	91.66	100	100	93.75	100	100	100	100	100		2	0	4	6		1	1	1	0	1	0	2	6
46	20	F	11:42AM	35	35	0.35mm	0.31mm	4.5	6.66	1	2	1	1	1	1	no	no	41.48	100	100	62.5	100	91.66	100	100	100	100	*	100	100		4	2	0	6		1	3	1	1	1	0	2	9
47	21	F	11:45AM	35	16	0.32mm	0.33mm	10	6.33	1	1	0	0	1	1	no	no	43.47	100	100	100	100	100	100	100	100	100	*	100	100		1	0	0	1		0	2	1	0	1	0	1	5
48	21	F	11:51AM	12	15	0.31mm	0.31mm	3.66	2.66	1	1	0	1	1	1	no	no	43.2	100	100	100	100	100	100	93.75	100	100	*	100	100		1	0	3	4		1	2	0	0	2	0	1	6
49	21	F	12:01PM	1	17	0.19mm	0.16mm	2.33	5.33	2	2	1	1	2	2	no	no	41.34	75	100	100	100	100	100	100	100	91.66	83.33	100	100		4	2	0	6		1	2	2	0	1	0	1	7
50	20	F	12:04PM	35	35	0.25mm	0.34mm	2.33	3	2	1	1	2	1	1	no	no	38.78	100	100	50	91.66	100	100	87.5	87.5	100	91.66	100	100		7	8	6	21		1	2	1	0	2	0	1	7
51	21	F	11:06AM	35	17	0.27mm	0.32mm	2	2.66	1	1	0	0	1	1	no	no	40.7	100	100	87.5	100	100	100	87.5	100	91.66	91.66	100	100		4	1	3	8		2	1	0	0	1	0	2	6
52	21	F	11:22AM	15	3	0.26mm	0.30mm	2.66	4	1	1	2	2	1	2	no	no	35.65	75	100	62.5	83.33	50	87.5	93.75	100	100	50	100	100		9	10	9	28		1	0	1	0	1	0	2	5
53	22	F	11:53AM	3	25	0.39mm	0.41mm	3	4	2	2	1	2	1	1	slight drop in blood pressure	no	41.1	75	100	100	91.66	100	100	93.75	100	100	83.33	100	100		0	0	0	0		2	2	2	0	1	0	2	9
54	22	F	11:22AM	27	23	0.23mm	0.22mm	4	2.66	1	1	0	0	1	1	no	no	37.08	75	80	50	75	66.66	87.5	93.75	100	100	*	100	100		5	2	5	12		0	2	1	0	1	0	1	5
55	22	F	11:43AM	35	35	0.30mm	0.38mm	5.66	6	1	1	0	0	1	1	no	no	42.84	100	100	100	91.66	100	100	93.75	100	100	*	100	100		1	0	1	2		1	2	1	0	1	0	0	5
56	21	M	12:30PM	35	35	0.23mm	0.25mm	7.66	6.66	1	1	2	2	1	1	no	no	39.9	75	100	50	100	100	100	87.5	100	100	100	100	100		2	1	2	5		1	3	1	0	1	0	2	8
57	21	M	12:59PM	35	10	0.37mm	0.35mm	4.66	4.66	1	1	3	3	2	2	no	no	42.06	100	100	100	100	100	100	93.75	100	100	100	100	100		4	8	6	18		1	2	0	0	1	0	1	5
58	22	M	1:22PM	35	35	0.29mm	0.30mm	5	2.33	1	2	1	2	1	1	no	no	41.58	50	100	87.5	100	100	100	93.75	100	100	100	100	100		2	2	4	8		1	1	1	0	1	0	1	5
59	22	M	1:04PM	35	30	0.30mm	0.35mm	3.33	4	1	1	2	2	2	1	no	no	37.77	75	80	75	83.33	91.66	100	93.75	75	91.66	91.66	100	100		5	10	5	20		1	2	2	2	2	0	2	11
60	23	M	1:12PM	35	18	0.33mm	0.30mm	5	6	2	2	2	1	1	1	no	no	42.3	100	100	100	100	100	100	100	100	100	100	100	100		0	0	0	0		3	1	1	0	1	0	1	7
61	25	M	11:18AM	35	35	0.26mm	0.21mm	3.66	4	1	1	2	2	1	2	no	no	40.78	50	100	75	100	100	100	93.75	100	100	91.66	100	100		7	1	1	9		1	1	1	0	1	0	0	4
62	24	M	12:44PM	35	33	0.31mm	0.32mm			1	1	\	\	2	2	no	no	40.78	100	100	87.5	100	91.66	100	81.25	100	100	100	100	100		10	0	5	15		1	3	0	0	1	0	1	6
63	20	M	12:24PM	27	25	0.42mm	0.31mm	7.66	8	1	1	0	0	1	1	no	no	41.82	50	100	100	100	100	100	87.5	100	100	100	100	100		1	1	1	3		1	2	0	0	1	0	0	4
64	23	M	12:36PM	35	32	0.46mm	0.48mm	7.66	4.33	1	1	2	3	3	3	no	no	40.41	75	80	87.5	91.66	100	100	100	100	100	91.66	100	100		1	0	1	2		1	0	1	0	1	0	1	4
65	21	M	1:15PM	28	33	0.30mm	0.34mm	3.66	4.66	1	1	\	\	1	1	no	no	42.3	100	100	100	100	100	100	100	100	100	100	100	100		2	0	1	3		1	1	2	0	1	0	0	5
66	20	M	11:15AM	35	35	0.27mm	0.33mm			1	1	1	1	2	1	no	no	21.68	50	80	75	50	58.33	37.5	56.25	50	66.66	*	25	0		0	0	4	4		0	0	0	0	2	1	1	4
67	19	M	11:26AM	35	35	0.29mm	0.30mm			1	1	1	1	1	1	no	no	42.06	25	100	100	100	100	100	93.75	100	100	100	100	100		0	0	2	2		1	1	1	0	1	0	1	5
68	23	F	11:44:00	33	35	0.39mm	0.42mm	3.66	3	2	2	1	1	1	1	no	no	39.78	75	80	62.5	100	83.33	100	93.75	100	91.66	83.33	100	100		7	6	9	22		1	0	1	0	1	0	1	4
69	21	F	2:00PM	35	5	0.22mm	0.29mm	7	6	1	1	1	2	1	1	no	no	35.25	75	100	100	100	66.66	100	75	100	58.33	66.66	100	50		9	3	3	15		1	0	1	0	1	0	1	4
70	23	M	11:01AM	32	35	0.29mm	0.39mm	3	3.66	1	1	2	1	2	1	no	no	39.9	100	100	100	75	100	100	100	87.5	100	75	100	100		5	9	5	19		1	1	1	0	1	0	1	5
71	22	M	11:00AM	35	35	0.38mm	0.30mm			1	1	2	2	2	2	no	no	33.03	75	80	75	75	50	87.5	87.5	87.5	100	58.33	50	75		11	6	7	24		1	2	0	0	2	2	2	9
72	23	M	11:40AM	26	20	0.28mm	0.28mm	2.33	2	1	1	1	1	2	2	no	no	38.54	25	100	100	91.66	83.33	100	93.75	100	100	83.33	100	50		4	3	2	9		1	0	1	0	1	0	3	6
73	22	M	1:44PM	33	14	0.23mm	0.32mm	3	3.66	2	2	1	1	2	2	asthma	no	40.25	100	80	87.5	100	100	87.5	100	100	100	91.66	100	100		10	2	0	12		1	0	3	3	1	0	1	9
74	21	M	12:13PM	27	35	0.21mm	0.24mm			1	1	1	2	1	1	no	no
75	22	M	1:33PM	35	26	0.28mm	0.28mm			1	1	1	1	2	2	no	no	39.58	50	100	100	91.66	100	87.5	100	100	100	100	75	75		3	2	2	7		1	1	1	0	1	0	0	4
76	23	M	11:11AM	35	35	0.30mm	0.34mm	2	1.66	1	1	2	2	1	1	no	no	40.38	75	100	87.5	91.66	91.66	87.5	100	100	100	91.66	100	100		6	5	1	12		3	0	1	3	2	0	2	11
77	23	F	12:58PM	19	9	0.17mm	0.17mm	4	3.33	1	1	0	0	1	1	no	no	41.79	75	80	100	100	100	100	81.25	100	100	*	100	100		0	1	0	1		1	3	1	0	1	0	2	8
78	20	F	12:21Pm	35	35	0.18mm	0.28mm	2	2.66	2	1	2	2	2	2	no	no	38.62	75	80	100	75	83.33	100	100	100	100	*	100	50		9	0	4	13		0	0	0	0	2	0	2	4
79	20	F	12:22PM	27	35	0.21mm	0.21mm	3	2.66	1	2	1	1	1	1	no	no	28.76	50	100	75	66.66	58.33	62.5	18.75	25	66.66	75	100	100		10	1	10	21		1	1	0	0	2	0	3	7
80	20	F	12:33PM	30	5	0.23mm	0.22mm	3.66	3.33	1	2	1	2	1	1	no	no	41.98	75	80	87.5	100	100	100	81.25	100	100	*	100	75		8	6	10	24		0	1	0	0	1	0	2	4
81	20	F	12:55Pm	35	35	0.28mm	0.30mm	4.33	3	1	1	1	1	1	1	no	no	35.81	75	80	25	91.66	91.66	100	93.75	75	91.66	*	100	75		12	4	12	28		0	2	0	0	1	0	3	6
82	20	F	12:50Pm	31	16	0.21mm	0.24mm	2.33	2.33	2	2	1	2	1	1	no	no	40.75	75	100	75	100	83.33	100	87.5	87.5	100	*	100	100		13	5	8	26		1	2	1	0	1	0	3	8
83	23	M	12:47PM	33	35	0.41mm	0.39mm	3.33	3.66	1	1	1	2	2	1	no	no	41.98	100	100	100	100	100	100	100	100	100	91.66	100	100		3	1	2	6		1	2	0	0	1	0	0	4
84	23	M	1:24PM	35	35	0.30mm	0.27mm	5.33	5	1	1	1	1	2	3	no	no	41.42	75	100	100	100	100	100	93.75	100	100	83.33	100	100		4	0	1	5		1	3	0	0	1	0	1	6
85	23	M	1:42PM	24	33	0.33mm	0.33mm	6.66	8	1	1	1	1	2	2	no	no	41.34	100	100	75	100	100	100	100	100	100	100	100	100		3	1	3	7		1	2	0	0	1	0	1	5
86	23	M	12:07PM	35	35	0.36mm	0.38mm	4	4.33	1	1	1	1	2	2	no	no	38.22	75	100	62.5	91.66	75	100	93.75	87.5	100	83.33	100	100		5	2	2	9		1	2	0	0	2	0	1	6
87	23	M	12:10PM	26	28	0.43mm	0.40mm	4.33	4.66	1	1	1	1	1	1	no	no	39.05	75	80	87.5	100	91.66	100	81.25	100	100	100	100	75		6	0	2	8		1	0	1	0	1	0	1	4
88	21	M	11:25:00	19	5											no	no	34.27	50	60	25	100	100	100	81.25	100	100	100	100	25		5	2	10	17		1	3	0	0	1	0	1	5
89	22	M	1:34PM	20	35	0.32mm	0.37mm	2.66	2.33	1	1	1	1	2	2	no	no	39.18	100	100	87.5	83.33	91.66	100	93.75	87.5	100	100	100	75		1	0	1	2		0	0	0	0	1	0	1	2
90	23	M	1:40PM	30	8	0.29mm	0.28mm	1.66	2.33	1	1	1	2	2	3	no	no	40.14	75	100	50	100	100	100	93.75	100	100	100	100	100		1	0	5	6		2	3	1	2	1	0	2	9
91	23	M	1:47PM	7	14	0.29mm	0.29mm	3.33	3.33	1	1	1	1	1	1	no	no	42.3	100	100	100	100	100	100	100	100	100	100	100	100		10	1	6	17		0	1	0	0	1	0	0	2
92	23	M	11:04AM	35	35	0.27mm	0.24mm	4.33	4	1	1	2	2	2	1	drop in sugar levl;	no	42.3	80	100	100	100	100	100	100	100	100	100	100	100		1	0	0	1		0	0	0	0	1	1	1	3
93	23	M	11:00AM	7	14	0.29mm	0.29mm	3.33	3.33	1	1	1	1	1	1	no	no	42.3	100	100	100	100	100	100	100	100	100	100	100	100		10	1	6	17		0	1	0	0	1	0	0	2
